# Supplementary material for: Predominant growth orientation of Li1.2(Mn0.4Co0.4)O2cathode materials produced by the NaOH compound molten salt method and their enhanced electrochemical performance
Source: Royal Society of Chemistry journal article supplement (doi:10.1039/c4ta02841d), 2014-07-22
Supplement: c4ta02841d1.pdf [file c4ta02841d1.pdf]

## Predominant orientation growth of $\text{Li}_{1.2}(\text{Mn}_{0.4}\text{Co}_{0.4})\text{O}_2$ cathode materials by NaOH compound molten salt method and their enhanced electrochemical performance

Xialin Liu, Jingjing Wu, Xiaolan Huang, Zhengwang Liu, Yin Zhang, Min Wang\* and Renchao Che\*

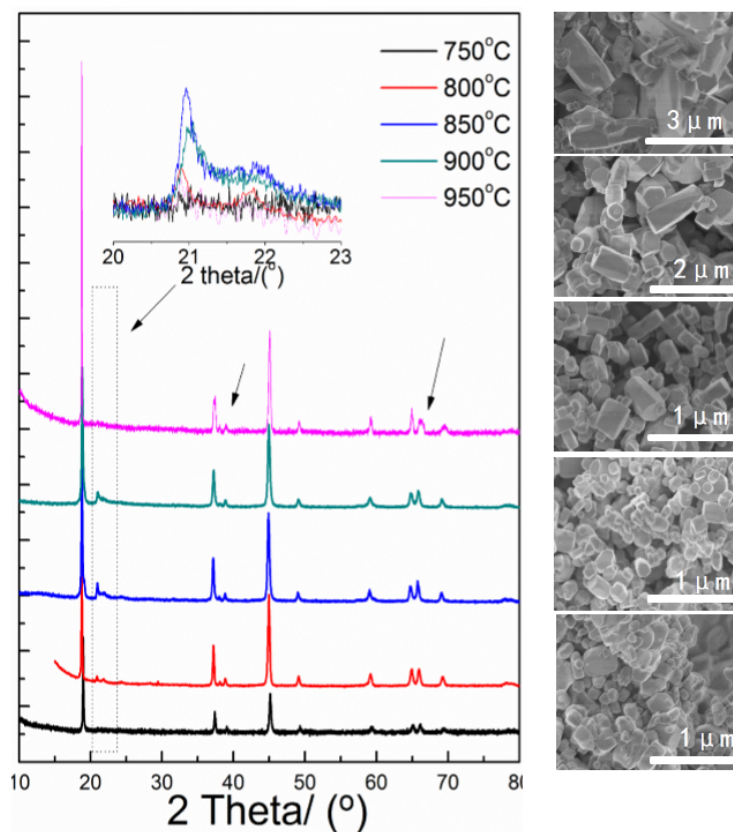

**Fig. S1** XRD and SEM images of  $\text{Li}_{1.2}(\text{Mn}_{0.4}\text{Co}_{0.4})\text{O}_2$  materials with different treating temperature when R=5.

**Table S1.** Rietveld refinement of XRD data of as-prepared  $\text{Li}_{1.2}(\text{Mn}_{0.4}\text{Co}_{0.4})\text{O}_2$  powders prepared at different heat treat temperature with  $R = 5$ .

| <b>R=5</b>          | <b>750°C</b> | <b>800°C</b> | <b>850°C</b> | <b>900°C</b> | <b>950°C</b> |
|---------------------|--------------|--------------|--------------|--------------|--------------|
| <b>I(003)/I(10)</b> | 1.8815       | 1.8738       | 1.7451       | 1.5136       | 2.5956       |
| <b>a/nm</b>         | 0.2831       | 0.2831       | 0.2830       | 0.2831       | 0.2823       |
| <b>c/nm</b>         | 1.4168       | 1.4170       | 1.4167       | 1.4180       | 1.4194       |
| <b>c/a</b>          | 5.0038       | 5.0046       | 5.0051       | 5.0086       | 5.0280       |
| <b>C2/m%</b>        | 21.78        | 22.01        | 23.75        | 18.66        | 10.11        |
| <b>R-3m%</b>        | 78.22        | 77.99        | 76.25        | 81.34        | 89.89        |

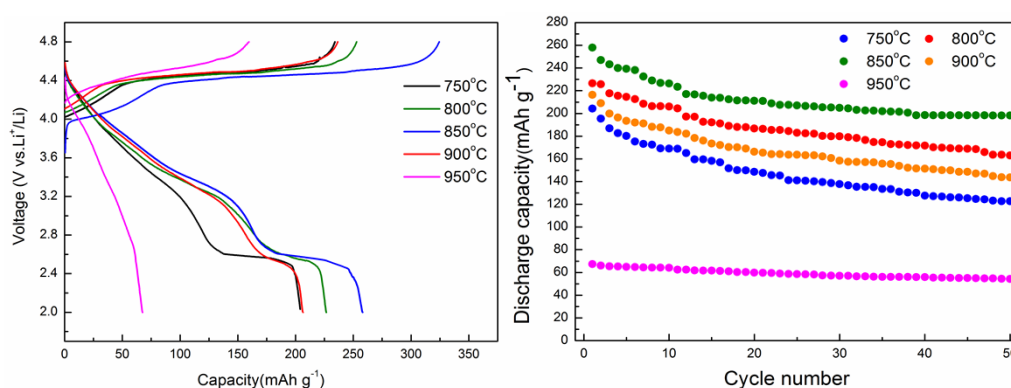

**Fig. S2** (a) Initial charge-discharge curves, and (b) Cycling stability of as-prepared  $\text{Li}_{1.2}(\text{Mn}_{0.4}\text{Co}_{0.4})\text{O}_2$  powders prepared at different heat treat temperature with different  $R = 5$ .

**Table S2.** Half peak width of three main peaks calculated by Jade 5 from XRD data of as-prepared  $\text{Li}_{1.2}(\text{Mn}_{0.4}\text{Co}_{0.4})\text{O}_2$  powders with different  $R$ .

| <b>Half peak width</b> | <b>R=</b> | <b>R=2.5</b> | <b>R=5</b> | <b>R=10</b> |
|------------------------|-----------|--------------|------------|-------------|
| <b>(003)</b>           | 0.2       | 0.223        | 0.149      | 0.138       |
| <b>(104)</b>           | 0.4       | 0.387        | 0.309      | 0.281       |
| <b>(101)</b>           | 0.3       | 0.289        | 0.252      | 0.223       |

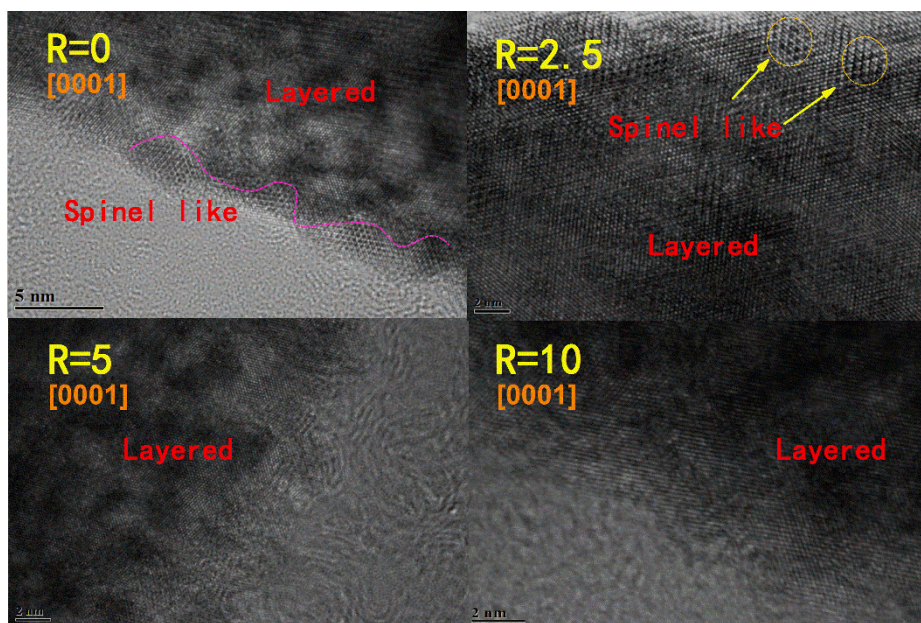

Fig. S3 HRTEM images for  $\text{Li}_{1.2}(\text{Mn}_{0.4}\text{Co}_{0.4})\text{O}_2$  with R=0/2.5/5/10 after initial discharge. The formation of spinel-like structure is clearly evidenced in the images of R=0 and R=2.5, however, it's not apparently in images for R=5 and R=10 indicating that the formation of spinel-like structure declined as NaOH added.

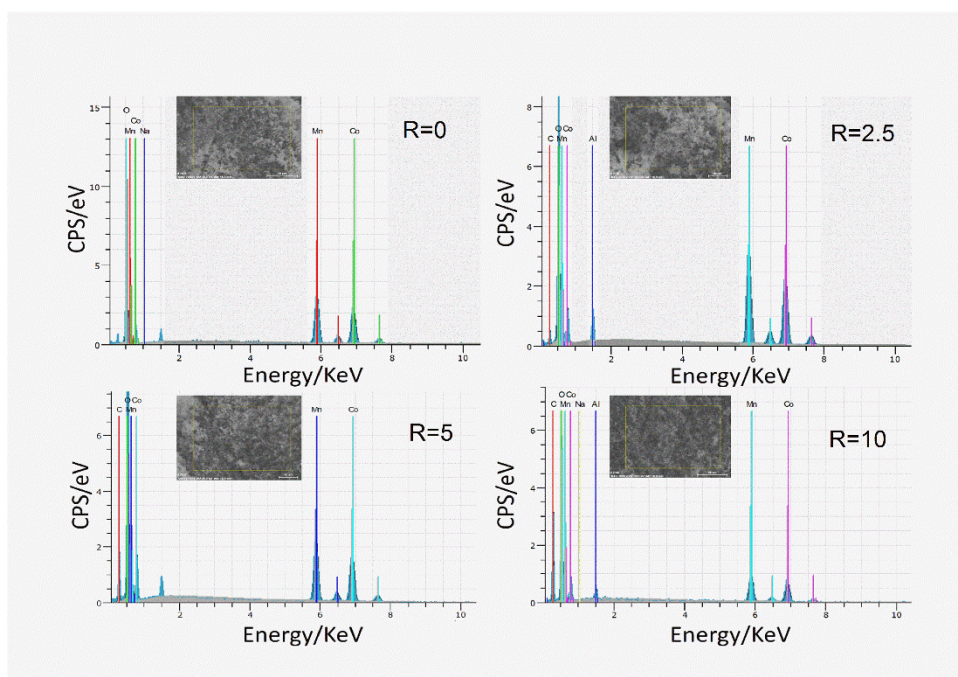

Fig. S4 EDX analysis of materials with different R. No peak is found in the position of Na.

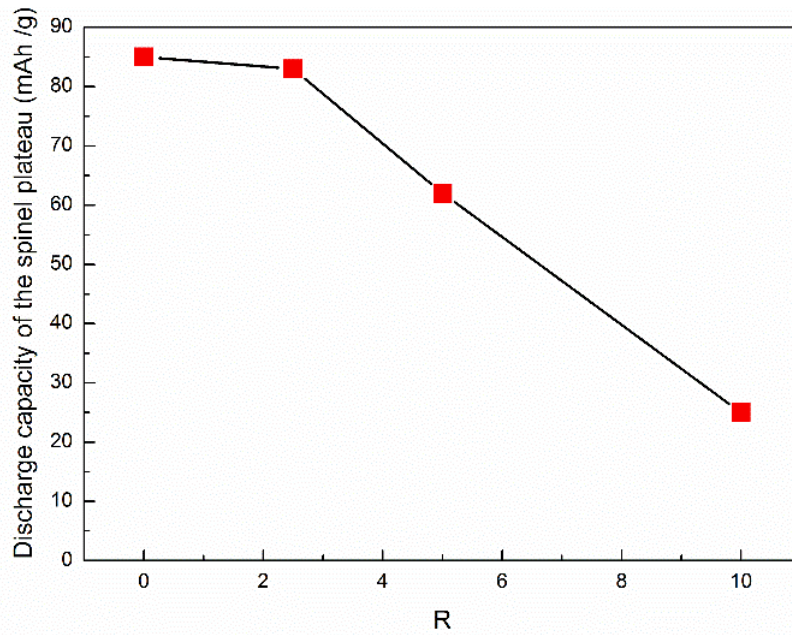

Fig. S5 The relationship of discharge capacity of the spinel plateau with different R

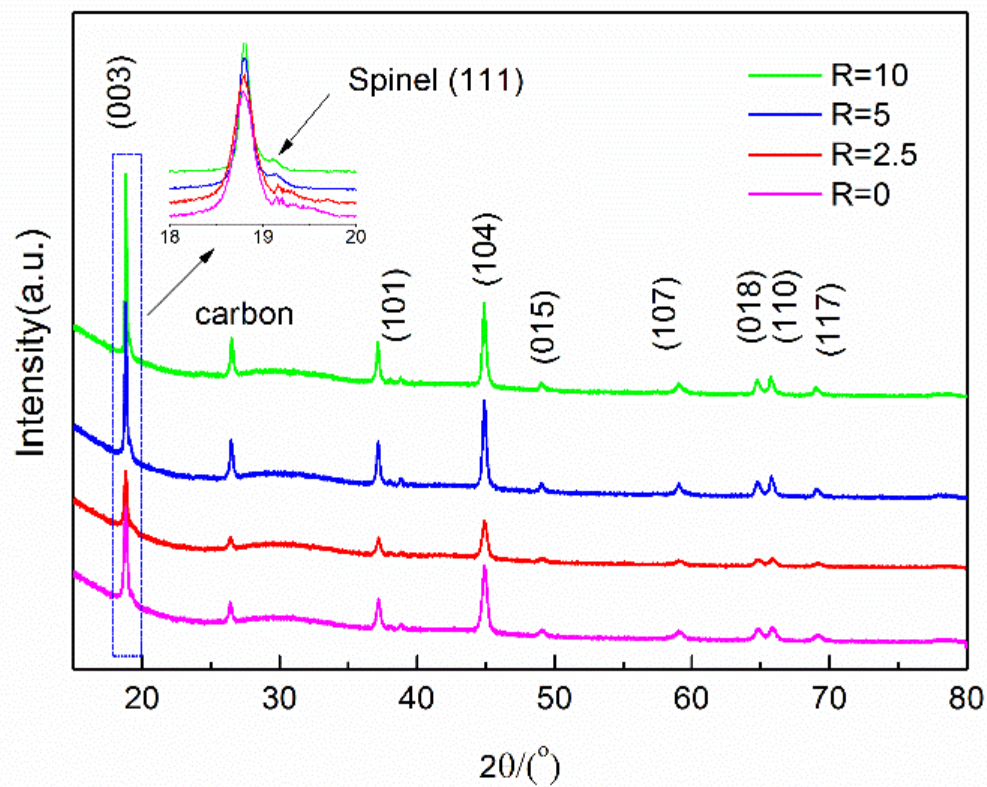

Fig. S6 XRD tests of materials with different R after one cycle

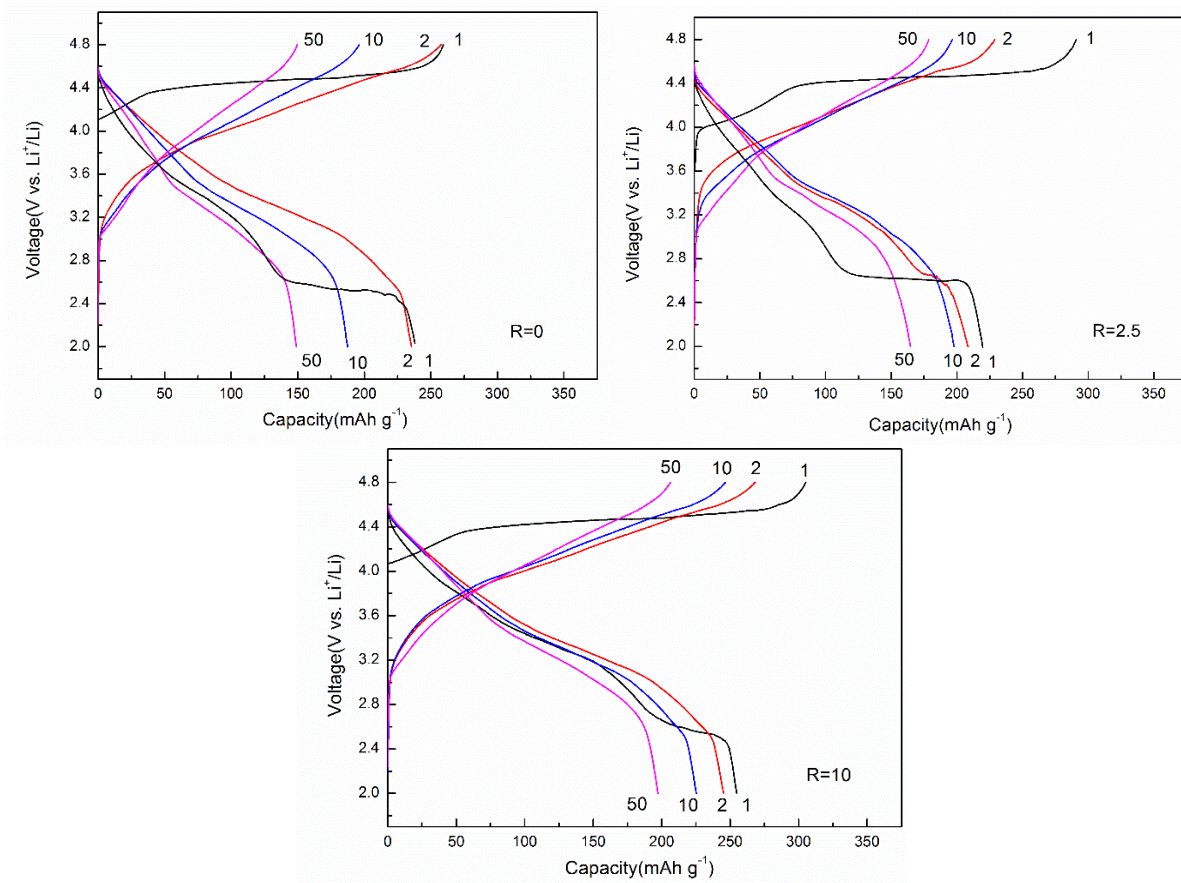

Fig. S7 Charge-discharge curves of different cycle numbers for the  $\text{Li}_{1.2}(\text{Mn}_{0.4}\text{Co}_{0.4})\text{O}_2$  prepared at  $850^\circ\text{C}$  for 12 h with  $R=0$ ,  $R=2.5$  and  $R=10$ .
